# Supplementary material for: Serum Metabolic Characterization of Vitamin E Deficiency in Holstein Cows during the Transition Period Based on Proton Nuclear Magnetic Resonance Spectroscopy
Source: MDPI journal article supplement (doi:10.3390/ani13182957), 2023-09-19
Supplement: s1 [file s1]

# Serum Metabolic Characterization of Vitamin E Deficiency in Holstein Cows during the Transition Period Based on Proton Nuclear Magnetic Resonance Spectroscopy

**Table S1.** <sup>1</sup>H NMR assignments of major metabolites in serum of cows.

| No. | Metabolites                                                     | δ <sub>H</sub> (ppm) <sup>a</sup>                          |
|-----|-----------------------------------------------------------------|------------------------------------------------------------|
| 1   | 3-Hydroxybutyrate                                               | 1.18(d)                                                    |
| 2   | Acetate                                                         | 1.92(s)                                                    |
| 3   | Acetone                                                         | 2.23(s)                                                    |
| 4   | Alanine                                                         | 1.48(d), 3.77(q)                                           |
| 5   | Choline                                                         | 3.2(s)                                                     |
| 6   | Citrate                                                         | 2.54(d), 2.68(d)                                           |
| 7   | Creatinine                                                      | 3.03(s), 3.04(s), 4.05(s)                                  |
| 8   | Dimethylamine                                                   | 2.71(s)                                                    |
| 9   | Formate                                                         | 8.45(s)                                                    |
| 10  | Glutamate                                                       | 2.07(m), 2.35(m)                                           |
| 11  | Glutamine                                                       | 2.13(m), 2.45(m)                                           |
| 12  | Glycine                                                         | 3.56(s)                                                    |
| 13  | Histidine                                                       | 7.05(s), 7.78(s)                                           |
| 14  | Isoleucine                                                      | 0.94(t), 1(d)                                              |
| 15  | Lipid, CH <sub>3</sub> -(CH <sub>2</sub> ) <sub>n</sub> -(LDL)  | 0.84(br)                                                   |
| 16  | Lipid, CH <sub>3</sub> -(CH <sub>2</sub> ) <sub>n</sub> -(VLDL) | 0.88(br)                                                   |
| 17  | Lipid, CH <sub>3</sub> -(CH <sub>2</sub> ) <sub>n</sub> -(LDL)  | 1.27(br)                                                   |
| 18  | VLDL, -CH <sub>2</sub> -CH <sub>2</sub> -C=O                    | 1.57(br)                                                   |
| 19  | Lipid, -CH <sub>2</sub> -CH=CH-                                 | 2.01(br)                                                   |
| 20  | Lipid, -CH <sub>2</sub> -C=O                                    | 2.23(br)                                                   |
| 21  | Lipid, =CH-CH <sub>2</sub> -CH=                                 | 2.76(m)                                                    |
| 22  | Lipid, -CH=CH-                                                  | 5.30(br)                                                   |
| 23  | Lactate                                                         | 1.33(d), 4.11(q)                                           |
| 24  | Leucine                                                         | 0.96(d), 0.97(d)                                           |
| 25  | Lysine                                                          | 1.50(m), 1.72(m), 1.90(m), 2.5(m), 3.01(m), 3.5(m), 4.5(m) |
| 26  | N-acetyl-glycoprotein                                           | 2.04(s)                                                    |
| 27  | O-acetyl-glycoprotein                                           | 2.14(s)                                                    |
| 28  | Phenylalanine                                                   | 7.33(m), 7.38(m), 7.43(m)                                  |
| 29  | Phosphorylcholine/Glycerophosphocholine                         | 3.22(s)                                                    |
| 30  | Pyruvate                                                        | 2.37(s)                                                    |
| 31  | Tyrosine                                                        | 6.9(d), 7.2(s)                                             |
| 32  | Valine                                                          | 0.99(d), 1.04(d), 3.62(d)                                  |
| 33  | α-Glucose                                                       | 3.42(dd), 3.54(dd), 3.71(t), 3.73(m), 3.84(m), 5.23(d)     |
| 34  | β-Glucose                                                       | 3.26(dd), 3.41(t), 3.46(m), 3.49(t), 3.90(dd)              |

<sup>a</sup>Chemical shift, s, singlet; d, doublet; t, triplet; q, quartet; dd, doublet of doublets; m, multiplet; br, broad resonance.

**Table S2.** Model parameters of principal component analysis (PCA).

| Model <sup>1</sup> | Type <sup>2</sup> | A <sup>3</sup> | N <sup>4</sup> | R <sup>2</sup> X (cum) <sup>5</sup> | Q <sup>2</sup> (cum) <sup>6</sup> | Title <sup>7</sup>       |
|--------------------|-------------------|----------------|----------------|-------------------------------------|-----------------------------------|--------------------------|
| M1                 | PCA-X             | 4              | 28             | 0.606                               | 0.312                             | VED group – Normal group |

<sup>1</sup>The number of the model modeled by the SIMCA software, which corresponds to the result file;

<sup>2</sup>The model type of SIMCA, PCA-X means to build a PCA model for the sample; <sup>3</sup>The number of principal components of the model; <sup>4</sup>The number of observations of the model (here is the number of samples); <sup>5</sup>The explanation of the model to the X variable; <sup>6</sup>The predictability of the model; <sup>7</sup>The data object corresponding to the model.

**Table S3.** Model parameters of orthogonal partial least-squares discriminant analysis (OPLS-DA).

| Model <sup>1</sup> | Type <sup>2</sup> | A <sup>3</sup> | N <sup>4</sup> | R <sup>2</sup> X (cum) <sup>5</sup> | R <sup>2</sup> Y (cum) <sup>6</sup> | Q <sup>2</sup> (cum) <sup>7</sup> | Title <sup>8</sup>       |
|--------------------|-------------------|----------------|----------------|-------------------------------------|-------------------------------------|-----------------------------------|--------------------------|
| M2                 | OPLS-DA           | 1+1+0          | 28             | 0.39                                | 0.918                               | 0.792                             | VED group – Normal group |

<sup>1</sup>The number of the model modeled by the SIMCA software, which corresponds to the result file;

<sup>2</sup>The model type of SIMCA, OPLS-DA means to build an OPLS-DA model for the sample; <sup>3</sup>The number of principal components of the model; <sup>4</sup>The number of observations of the model (here is the number of samples); <sup>5</sup>The explanation of the model to the X variable; <sup>6</sup>The explanation of the model to the Y variable; <sup>7</sup>The predictability of the model; <sup>8</sup>The data object corresponding to the model.
